# Supplementary material for: Efficient synthesis of L-lactic acid from glycerol by metabolically engineered Escherichia coli
Source: PubMed Central journal article supplement (PMC3616864; doi:10.1186/1475-2859-12-7), 2013-01-25
Supplement: 1475-2859-12-7-S1.pdf [file 1475-2859-12-7-S1.pdf]

1  
2  
3  
4  
5  
6  
7  
8  
9  
10  
11  
12  
13  
14  
15  
16  
17  
18  
19  
20  
21  
22  
23  
24  
25

**SUPPLEMENTAL MATERIALS FOR:**

**Efficient synthesis of L-lactic acid from glycerol by metabolically engineered  
*Escherichia coli***

Suman Mazumdar<sup>1</sup>, Matthew D. Blankschien<sup>1</sup>, James M. Clomburg<sup>1</sup>, and Ramon Gonzalez<sup>1,2\*</sup>

<sup>1</sup>Department of Chemical and Biomolecular Engineering, Rice University, Houston, Texas

and <sup>2</sup>Department of Bioengineering, Rice University, Houston, Texas

\*To whom correspondence should be addressed:

Department of Chemical and Biomolecular Engineering,

Rice University

6100 Main Street, MS-362

Houston, TX 77005

Phone: (713)-348-4893, Fax: (713) 348-5478

*email*: Ramon.Gonzalez@rice.edu

**Keywords:** L-lactic acid, glycerol, metabolic engineering, *Escherichia coli*

1 To evaluate the dissolved oxygen levels present under our microaerobic conditions, we  
2 utilized the DO-166MT-1 Micro Dissolved Oxygen Electrode System as according to  
3 manufacturer protocol (Lazar Research Laboratories, Inc., Los Angeles, CA). Flask  
4 fermentations were conducted as described in the main text utilizing 40 g/L of refined glycerol,  
5 50 g/L CaCO<sub>3</sub>, and a starting OD550 of 0.6. The micro electrode was sterilized with 5% w/v  
6 formaldehyde, washed with sterile deionized water, and inserted into the media through a hole in  
7 the foam plugs made before autoclaving. Figure S1 shows the DO percentages and the  
8 volumetric oxygen transfer rates (OTR, see below) vs. time conducting flask fermentations with  
9 MG1655 and LA20 *lld* [pZS-glpK-glpD] cultures. Regardless of genotype, the DO levels rapidly  
10 decreased from 100% (7.2 mg O<sub>2</sub>/L) to near 0% within the first 30 minutes, and, within a period  
11 of a couple of hours, fell below the detection limit (microaerobic levels)(Fig. S1). Furthermore,  
12 the DO remained below the detection limit well-beyond the time course of our fermentations  
13 (□72 hours, data not shown). The volumetric oxygen transfer rate can be calculated as  $OTR =$   
14  $k_{La} (C^* - C)$  where C\* is the saturated dissolved oxygen level in liquid (7.2 mg O<sub>2</sub>/L), C is the  
15 actual dissolved measured oxygen concentration, and  $k_{La}$  is the volumetric oxygen transfer  
16 coefficient (h<sup>-1</sup>) (see below). At or near microaerobic levels, C is essentially 0 and the OTR  
17 becomes constant ( $OTR = k_{La} (C^*)$ ), providing a volumetric rate of oxygen uptake equal to the  
18 volumetric rate of oxygen transfer. Thus, except for the very initial period right after inoculation,  
19 the OTR is constant between cultures for almost the entire course of the fermentation and is  
20 determined by the  $k_{La}$  of the flask/conditions. Because of this, the microaerobic conditions can  
21 act as an oxygen control, enabling better direct comparison for L-lactate production between  
22 genotypes. We evaluated the response time of the micro DO probe used here and found it to be  
23 less than a second; therefore the DO values indicate the actual oxygen profiles in the culture. The

1  $k_{La}$  for our conditions was then determined by the gassing out method as  $19 \pm 1.3 \text{ h}^{-1}$ , providing  
2 an OTR  $137 \text{ mg O}_2 \text{ L}^{-1} \text{ h}^{-1}$  after the initial period [49].

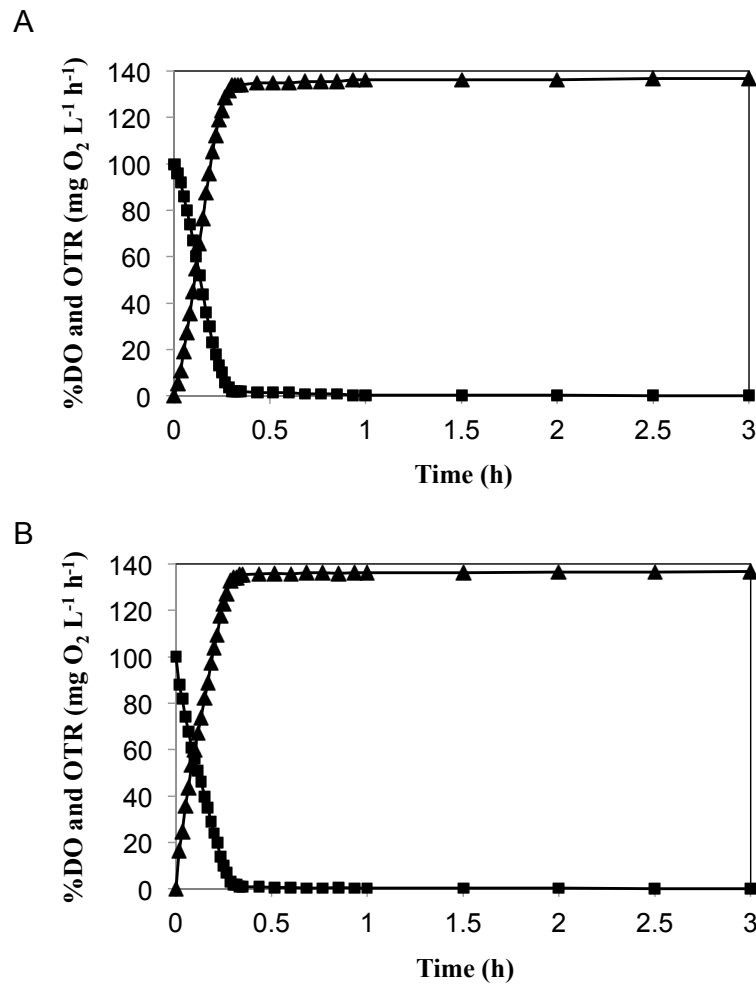

17 **Fig. S1.** Percent dissolved oxygen (DO) and oxygen transfer rate (OTR) vs. time of wild-type  
18 and the final L-lactate biocatalyst. Symbols denote: % DO (■) and OTR (▲). (A) Wild-type  
19 MG1655. (B) LA20 *lld* [pZS-glpK-glpD].

20

## 21 Supplemental References

22 49. Garcia-Ochoa F, Gomez, E: **Bioreactor scale-up and oxygen transfer rate in microbial**  
23 **processes: An overview.** *Biotech Adv* 2009, **27**:153-176.
